# Supplementary material
Source: HighWire-hosted journal article supplement (https://sit.bmj.com/highwire/filestream/375/field_highwire_adjunct_files/0/bmjsit-2021-000089supp001_data_supplement.pdf)
Supplement: bmjsit-2021-000089supp001_data_supplement.pdf [file bmjsit-2021-000089supp001_data_supplement.pdf]

## Supplementary Material

### Supplementary Table 1: Healthcare Common Procedure Coding System (HCPCS) Codes for Catheters Used During Cardiac Ablation

| Code  | Code Description                                                                                       |
|-------|--------------------------------------------------------------------------------------------------------|
| C1732 | Catheter, electrophysiology, diagnostic/ablation, 3d or vector mapping                                 |
| C1733 | Catheter, electrophysiology, diagnostic/ablation, other than 3d or vector mapping, other than cool-tip |
| C2630 | Catheter, electrophysiology, diagnostic/ablation, other than 3d or vector mapping, cool-tip            |

**Supplementary Table 2: Current Procedural Terminology (CPT) Codes for Procedures of Interest**

| <b>Code</b> | <b>Code Description</b>                                                                                                                                                                                                                                                                                                                                                                                                                                                                                                                                                                   |
|-------------|-------------------------------------------------------------------------------------------------------------------------------------------------------------------------------------------------------------------------------------------------------------------------------------------------------------------------------------------------------------------------------------------------------------------------------------------------------------------------------------------------------------------------------------------------------------------------------------------|
| 93654       | Comprehensive electrophysiologic evaluation including insertion and repositioning of multiple electrode catheters with induction or attempted induction of an arrhythmia with right atrial pacing and recording, right ventricular pacing and recording (when necessary), and His bundle recording (when necessary) with intracardiac catheter ablation of arrhythmogenic focus; with treatment of ventricular tachycardia or focus of ventricular ectopy including intracardiac electrophysiologic 3D mapping, when performed, and left ventricular pacing and recording, when performed |
| 93656       | Comprehensive electrophysiologic evaluation including transseptal catheterizations, insertion and repositioning of multiple electrode catheters with induction or attempted induction of an arrhythmia including left or right atrial pacing/recording when necessary, right ventricular pacing/recording when necessary, and His bundle recording when necessary with intracardiac catheter ablation of atrial fibrillation by pulmonary vein isolation                                                                                                                                  |
| 93657       | Additional linear or focal intracardiac catheter ablation of the left or right atrium for treatment of atrial fibrillation remaining after completion of pulmonary vein isolation (List separately in addition to code for primary procedure)                                                                                                                                                                                                                                                                                                                                             |

**Supplementary Table 3: International Classification of Diseases (ICD)-9-Clinical Modification (CM), ICD-10-CM, and SNOMED CT Codes for Patient Populations of Interest**

| <b>Population of Interest</b>                                                                                                                                           | <b>Source</b> | <b>Code</b> | <b>Code Description</b>            |
|-------------------------------------------------------------------------------------------------------------------------------------------------------------------------|---------------|-------------|------------------------------------|
| Patients with atrial fibrillation had at least one of the following diagnosis codes prior to or during the clinical encounter that included the ablation procedure      | ICD-9-CM      | 427.31      | Atrial fibrillation                |
|                                                                                                                                                                         | ICD-10-CM     | I48.0       | Paroxysmal atrial fibrillation     |
|                                                                                                                                                                         | ICD-10-CM     | I48.1       | Persistent atrial fibrillation     |
|                                                                                                                                                                         | ICD-10-CM     | I48.2       | Chronic atrial fibrillation        |
| Patients with ventricular tachycardia: had at least one of the following diagnosis codes prior to or during the clinical encounter that included the ablation procedure | ICD-10-CM     | I48.91      | Unspecified atrial fibrillation    |
|                                                                                                                                                                         | ICD-9-CM      | 427.1       | Paroxysmal ventricular tachycardia |
|                                                                                                                                                                         | ICD-10-CM     | I47.2       | Ventricular tachycardia            |

**Supplementary Table 4: International Classification of Diseases (ICD)-9-Clinical Modification (CM) and ICD-10-CM for Patients with Ischemic Heart Disease**

| Source   | Code   | Code Description                                                                  |
|----------|--------|-----------------------------------------------------------------------------------|
| ICD-9-CM | 410.00 | Acute myocardial infarction of anterolateral wall, episode of care unspecified    |
| ICD-9-CM | 410.01 | Acute myocardial infarction of anterolateral wall, initial episode of care        |
| ICD-9-CM | 410.02 | Acute myocardial infarction of anterolateral wall, subsequent episode of care     |
| ICD-9-CM | 410.10 | Acute myocardial infarction of other anterior wall, episode of care unspecified   |
| ICD-9-CM | 410.11 | Acute myocardial infarction of other anterior wall, initial episode of care       |
| ICD-9-CM | 410.12 | Acute myocardial infarction of other anterior wall, subsequent episode of care    |
| ICD-9-CM | 410.20 | Acute myocardial infarction of inferolateral wall, episode of care unspecified    |
| ICD-9-CM | 410.21 | Acute myocardial infarction of inferolateral wall, initial episode of care        |
| ICD-9-CM | 410.22 | Acute myocardial infarction of inferolateral wall, subsequent episode of care     |
| ICD-9-CM | 410.30 | Acute myocardial infarction of inferoposterior wall, episode of care unspecified  |
| ICD-9-CM | 410.31 | Acute myocardial infarction of inferoposterior wall, initial episode of care      |
| ICD-9-CM | 410.32 | Acute myocardial infarction of inferoposterior wall, subsequent episode of care   |
| ICD-9-CM | 410.40 | Acute myocardial infarction of other inferior wall, episode of care unspecified   |
| ICD-9-CM | 410.41 | Acute myocardial infarction of other inferior wall, initial episode of care       |
| ICD-9-CM | 410.42 | Acute myocardial infarction of other inferior wall, subsequent episode of care    |
| ICD-9-CM | 410.50 | Acute myocardial infarction of other lateral wall, episode of care unspecified    |
| ICD-9-CM | 410.51 | Acute myocardial infarction of other lateral wall, initial episode of care        |
| ICD-9-CM | 410.52 | Acute myocardial infarction of other lateral wall, subsequent episode of care     |
| ICD-9-CM | 410.60 | True posterior wall infarction, episode of care unspecified                       |
| ICD-9-CM | 410.61 | True posterior wall infarction, initial episode of care                           |
| ICD-9-CM | 410.62 | True posterior wall infarction, subsequent episode of care                        |
| ICD-9-CM | 410.70 | Subendocardial infarction, episode of care unspecified                            |
| ICD-9-CM | 410.71 | Subendocardial infarction, initial episode of care                                |
| ICD-9-CM | 410.72 | Subendocardial infarction, subsequent episode of care                             |
| ICD-9-CM | 410.80 | Acute myocardial infarction of other specified sites, episode of care unspecified |
| ICD-9-CM | 410.81 | Acute myocardial infarction of other specified sites, initial episode of care     |
| ICD-9-CM | 410.82 | Acute myocardial infarction of other specified sites, subsequent episode of care  |
| ICD-9-CM | 410.90 | Acute myocardial infarction of unspecified site, episode of care                  |

|           |         |                                                                                               |
|-----------|---------|-----------------------------------------------------------------------------------------------|
|           |         | unspecified                                                                                   |
| ICD-9-CM  | 410.91  | Acute myocardial infarction of unspecified site, initial episode of care                      |
| ICD-9-CM  | 410.92  | Acute myocardial infarction of unspecified site, subsequent episode of care                   |
| ICD-9-CM  | 411.89  | Other acute and subacute forms of ischemic heart disease, other                               |
| ICD-9-CM  | 412     | Old myocardial infarction                                                                     |
| ICD-9-CM  | 414.00  | Coronary atherosclerosis of unspecified type of vessel, native or graft                       |
| ICD-9-CM  | 414.01  | Coronary atherosclerosis of native coronary artery                                            |
| ICD-9-CM  | 414.02  | Coronary atherosclerosis of autologous vein bypass graft                                      |
| ICD-9-CM  | 414.03  | Coronary atherosclerosis of nonautologous biological bypass graft                             |
| ICD-9-CM  | 414.04  | Coronary atherosclerosis of artery bypass graft                                               |
| ICD-9-CM  | 414.05  | Coronary atherosclerosis of unspecified bypass graft convert                                  |
| ICD-9-CM  | 414.06  | Coronary atherosclerosis of native coronary artery of transplanted heart                      |
| ICD-9-CM  | 414.07  | Coronary atherosclerosis of bypass graft (artery) (vein) of transplanted heart                |
| ICD-9-CM  | 414.2   | Chronic total occlusion of coronary artery                                                    |
| ICD-9-CM  | 414.3   | Coronary atherosclerosis due to lipid rich plaque                                             |
| ICD-9-CM  | 414.4   | Coronary atherosclerosis due to calcified coronary lesion                                     |
| ICD-9-CM  | 414.8   | Other specified forms of chronic ischemic heart disease                                       |
| ICD-9-CM  | 414.9   | Chronic ischemic heart disease, unspecified                                                   |
| ICD-10-CM | I21.01  | ST elevation (STEMI) myocardial infarction involving left main coronary artery                |
| ICD-10-CM | I21.02  | ST elevation (STEMI) myocardial infarction involving left anterior descending coronary artery |
| ICD-10-CM | I21.09  | ST elevation (STEMI) myocardial infarction involving other coronary artery of anterior wall   |
| ICD-10-CM | I21.11  | ST elevation (STEMI) myocardial infarction involving right coronary artery                    |
| ICD-10-CM | I21.19  | ST elevation (STEMI) myocardial infarction involving other coronary artery of inferior wall   |
| ICD-10-CM | I21.21  | ST elevation (STEMI) myocardial infarction involving left circumflex coronary artery          |
| ICD-10-CM | I21.29  | ST elevation (STEMI) myocardial infarction involving other sites                              |
| ICD-10-CM | I21.3   | ST elevation (STEMI) myocardial infarction of unspecified site                                |
| ICD-10-CM | I21.4   | Non-ST elevation (NSTEMI) myocardial infarction                                               |
| ICD-10-CM | I22.0   | Subsequent ST elevation (STEMI) myocardial infarction of anterior wall                        |
| ICD-10-CM | I22.1   | Subsequent ST elevation (STEMI) myocardial infarction of inferior wall                        |
| ICD-10-CM | I22.2   | Subsequent non-ST elevation (NSTEMI) myocardial infarction                                    |
| ICD-10-CM | I22.8   | Subsequent ST elevation (STEMI) myocardial infarction of other sites                          |
| ICD-10-CM | I22.9   | Subsequent ST elevation (STEMI) myocardial infarction of unspecified site                     |
| ICD-10-CM | I24.8   | Other forms of acute ischemic heart disease                                                   |
| ICD-10-CM | I24.9   | Acute ischemic heart disease, unspecified                                                     |
| ICD-10-CM | I25.10  | Atherosclerotic heart disease of native coronary artery without angina pectoris               |
| ICD-10-CM | I25.110 | Atherosclerotic heart disease of native coronary artery with unstable angina pectoris         |

|           |         |                                                                                                                 |
|-----------|---------|-----------------------------------------------------------------------------------------------------------------|
| ICD-10-CM | I25.111 | Atherosclerotic heart disease of native coronary artery with documented spasm                                   |
| ICD-10-CM | I25.118 | Atherosclerotic heart disease of native coronary artery with other forms of angina pectoris                     |
| ICD-10-CM | I25.119 | Atherosclerotic heart disease of native coronary artery with unspecified angina                                 |
| ICD-10-CM | I25.2   | Old myocardial infarction                                                                                       |
| ICD-10-CM | I25.5   | Ischemic cardiomyopathy                                                                                         |
| ICD-10-CM | I25.700 | Atherosclerosis of coronary artery bypass graft(s), unspecified, with unstable angina pectoris                  |
| ICD-10-CM | I25.701 | Atherosclerosis of coronary artery bypass graft(s), unspecified, with documented spasm                          |
| ICD-10-CM | I25.708 | Atherosclerosis of coronary artery bypass graft(s), unspecified, with other forms of angina pectoris            |
| ICD-10-CM | I25.709 | Atherosclerosis of coronary artery bypass graft(s), unspecified, with unspecified angina pectoris               |
| ICD-10-CM | I25.710 | Atherosclerosis of autologous vein coronary artery bypass graft(s) with unstable angina pectoris                |
| ICD-10-CM | I25.711 | Atherosclerosis of autologous vein coronary artery bypass graft(s) with documented spasm                        |
| ICD-10-CM | I25.718 | Atherosclerosis of autologous vein coronary artery bypass graft(s) with other forms of angina pectoris          |
| ICD-10-CM | I25.719 | Atherosclerosis of autologous vein coronary artery bypass graft(s) with unspecified angina pectoris             |
| ICD-10-CM | I25.720 | Atherosclerosis of autologous artery coronary artery bypass graft(s) with unstable angina pectoris              |
| ICD-10-CM | I25.721 | Atherosclerosis of autologous artery coronary artery bypass graft(s) with documented spasm                      |
| ICD-10-CM | I25.728 | Atherosclerosis of autologous artery coronary artery bypass graft(s) with other forms of angina pectoris        |
| ICD-10-CM | I25.729 | Atherosclerosis of autologous artery coronary artery bypass graft(s) with unspecified angina pectoris           |
| ICD-10-CM | I25.730 | Atherosclerosis of nonautologous biological coronary artery bypass graft(s) with unstable angina pectoris       |
| ICD-10-CM | I25.731 | Atherosclerosis of nonautologous biological coronary artery bypass graft(s) with documented spasm               |
| ICD-10-CM | I25.738 | Atherosclerosis of nonautologous biological coronary artery bypass graft(s) with other forms of angina pectoris |
| ICD-10-CM | I25.739 | Atherosclerosis of nonautologous biological coronary artery bypass graft(s) with unspecified angina pectoris    |
| ICD-10-CM | I25.750 | Atherosclerosis of native coronary artery of transplanted heart with unstable angina                            |
| ICD-10-CM | I25.751 | Atherosclerosis of native coronary artery of transplanted heart with documented spasm                           |
| ICD-10-CM | I25.758 | Atherosclerosis of native coronary artery of transplanted heart with other forms of angina pectoris             |
| ICD-10-CM | I25.759 | Atherosclerosis of native coronary artery of transplanted heart with unspecified angina pectoris                |

|           |         |                                                                                                              |
|-----------|---------|--------------------------------------------------------------------------------------------------------------|
| ICD-10-CM | I25.760 | Atherosclerosis of bypass graft of coronary artery of transplanted heart with unstable angina                |
| ICD-10-CM | I25.761 | Atherosclerosis of bypass graft of coronary artery of transplanted heart with documented spasm               |
| ICD-10-CM | I25.768 | Atherosclerosis of bypass graft of coronary artery of transplanted heart with other forms of angina pectoris |
| ICD-10-CM | I25.769 | Atherosclerosis of bypass graft of coronary artery of transplanted heart with unspecified angina pectoris    |
| ICD-10-CM | I25.790 | Atherosclerosis of other coronary artery bypass graft(s) with unstable angina pectoris                       |
| ICD-10-CM | I25.791 | Atherosclerosis of other coronary artery bypass graft(s) with documented spasm                               |
| ICD-10-CM | I25.798 | Atherosclerosis of other coronary artery bypass graft(s) with other forms of angina pectoris                 |
| ICD-10-CM | I25.799 | Atherosclerosis of other coronary artery bypass graft(s) with unspecified angina pectoris                    |
| ICD-10-CM | I25.810 | Atherosclerosis of coronary artery bypass graft(s) without angina pectoris                                   |
| ICD-10-CM | I25.811 | Atherosclerosis of native coronary artery of transplanted heart without angina pectoris                      |
| ICD-10-CM | I25.812 | Atherosclerosis of bypass graft of coronary artery of transplanted heart without angina pectoris             |
| ICD-10-CM | I25.82  | Chronic total occlusion of coronary artery                                                                   |
| ICD-10-CM | I25.83  | Coronary atherosclerosis due to lipid rich plaque                                                            |
| ICD-10-CM | I25.84  | Coronary atherosclerosis due to calcified coronary lesion                                                    |
| ICD-10-CM | I25.89  | Other forms of chronic ischemic heart disease                                                                |
| ICD-10-CM | I25.9   | Chronic ischemic heart disease, unspecified                                                                  |

**Supplementary Table 5: Algorithms for Clinical Outcomes of Interest (Ischemic Stroke, Cardiac Tamponade, Acute Heart Failure, and Arrhythmia-related Hospitalization) using International Classification of Diseases (ICD)-9-Clinical Modification (CM), ICD-10-CM, ICD-10-Procedure Coding System (PCS), Healthcare Common Procedure Coding System (HCPCS), and Current Procedural Terminology Codes**

**Ischemic Stroke Algorithm**

|                                                                                                                                                                                                                            |
|----------------------------------------------------------------------------------------------------------------------------------------------------------------------------------------------------------------------------|
| <b>Consider ICD codes from hospitalizations including inpatient or emergency department only</b>                                                                                                                           |
| <b>Exclude</b> patient/hospitalization if any traumatic brain injury (ICD-9-CM 800-804, 850-854. ICD-10-CM related to traumatic brain injury – please see below) present pre-ablation on/before ischemic stroke indication |
| <b>Include patient if presence of:</b>                                                                                                                                                                                     |
| ICD-9-CM 434.x1 (Cerebral embolism/occlusion misc)                                                                                                                                                                         |
| ICD-9-CM 362.31 (Central retinal artery occlusion)                                                                                                                                                                         |
| ICD-10-CM I63.x (Cerebral infarction misc)                                                                                                                                                                                 |
| ICD-10-CM H34.1x (Central retinal artery occlusion misc)                                                                                                                                                                   |

**Cardiac Tamponade Algorithm**

|                                                                                                            |
|------------------------------------------------------------------------------------------------------------|
| <b>Consider ICD codes from hospitalizations including inpatient or emergency department only</b>           |
| <b>Include patient if presence of:</b>                                                                     |
| ICD-9-PCS: 37.0 (pericardiocentesis)                                                                       |
| ICD-9-CM 423.3 (Cardiac tamponade)                                                                         |
| ICD-9-CM 423.0 (Hemopericardium)                                                                           |
| ICD-10-CM I31.4 (Cardiac tamponade)                                                                        |
| ICD-10-CM I31.2 (Hemopericardium, not elsewhere classified)                                                |
| ICD-10-PCS 0W9C30Z (Drainage of Mediastinum with Drainage Device, Percutaneous Approach)                   |
| ICD-10-PCS 0W9C3ZZ (Drainage of Mediastinum, Percutaneous Approach_                                        |
| ICD-10-PCS 0W9D30Z (Drainage of Pericardial Cavity with Drainage Device, Percutaneous Approach)            |
| ICD-10-PCS 0W9D3ZX (Drainage of Pericardial Cavity, Percutaneous Approach, Diagnostic)                     |
| ICD-10-PCS 0W9D3ZZ (Drainage of Pericardial Cavity, Percutaneous Approach)                                 |
| ICD-10-PCS 0W9D40Z (Drainage of Pericardial Cavity with Drainage Device, Percutaneous Endoscopic Approach) |
| ICD-10-PCS 0W9D4ZX (Drainage of Pericardial Cavity, Percutaneous Endoscopic Approach, Diagnostic)          |
| ICD-10-PCS 0W9D4ZZ (Drainage of Pericardial Cavity, Percutaneous Endoscopic Approach)                      |
| HCPCS/CPT code G9408 (Cardiac tamponade and/or pericardiocentesis occurring within 30 days)                |

**Acute Heart Failure Algorithm**

|                                                                                                  |
|--------------------------------------------------------------------------------------------------|
| <b>Consider ICD codes from hospitalizations including inpatient or emergency department only</b> |
|--------------------------------------------------------------------------------------------------|



|                                                                                                                                                            |
|------------------------------------------------------------------------------------------------------------------------------------------------------------|
| <b>Exclude</b> patient/hospitalization if it does not include at least one dose of intravenous diuresis from 1-day post-ablation to 30 days post-ablation. |
| <b>Include patient if presence of:</b>                                                                                                                     |
| ICD-9-CM 428.21 (Acute systolic heart failure)                                                                                                             |
| ICD-9-CM 428.23 (Acute on chronic systolic heart failure)                                                                                                  |
| ICD-9-CM 428.31 (Acute diastolic heart failure)                                                                                                            |
| ICD-9-CM 428.33 (Acute on chronic diastolic heart failure)                                                                                                 |
| ICD-9-CM 428.41 (Acute combined systolic and diastolic heart failure)                                                                                      |
| ICD-10-CM I50.811 (Acute right heart failure)                                                                                                              |
| ICD-10-CM I50.813 (Acute on chronic right heart failure)                                                                                                   |
| ICD-10-CM I50.21 (Acute systolic [congestive] heart failure)                                                                                               |
| ICD-10-CM I50.23 (Acute on chronic systolic [congestive] heart failure)                                                                                    |
| ICD-10-CM I50.31 (Acute diastolic [congestive] heart failure)                                                                                              |
| ICD-10-CM I50.33 (Acute on chronic diastolic [congestive] heart failure)                                                                                   |
| ICD-10-CM I50.41 (Acute combined systolic [congestive] and diastolic [congestive] heart failure)                                                           |
| ICD-10-CM I50.43 (Acute on chronic combined systolic [congestive] and diastolic [congestive] heart failure)                                                |

#### Arrhythmia-related Hospitalization Algorithm

|                                                                      |
|----------------------------------------------------------------------|
| <b>Include patient if presence of:</b>                               |
| ICD-9-CM 427.2 (Paroxysmal tachycardia, unspecified)                 |
| ICD-9-CM 427.31 (Atrial fibrillation)                                |
| ICD-9-CM 427.32 (Atrial flutter)                                     |
| ICD-9-CM 427.4 (Ventricular fibrillation and flutter)                |
| ICD-9-CM 427.42 (Ventricular flutter)                                |
| ICD-9-CM 427.41 (Ventricular fibrillation)                           |
| ICD-10-CM I46.2 (Cardiac arrest due to underlying cardiac condition) |
| ICD-10-CM I47.0 (Re-entry ventricular arrhythmia)                    |
| ICD-10-CM I47.1 (Supraventricular tachycardia)                       |
| ICD-10-CM I47.2 (Ventricular tachycardia)                            |
| ICD-10-CM I48.0 (Paroxysmal atrial fibrillation)                     |
| ICD-10-CM I48.1 (Persistent atrial fibrillation)                     |
| ICD-10-CM I48.2 (Chronic atrial fibrillation)                        |
| ICD-10-CM I48.3 (Typical atrial flutter)                             |
| ICD-10-CM I48.4 (Atypical atrial flutter)                            |
| ICD-10-CM I48.91 (Unspecified atrial fibrillation)                   |
| ICD-10-CM I48.92 (Unspecified atrial flutter)                        |
| ICD-10-CM I49.01 (Ventricular fibrillation)                          |
| ICD-10-CM I49.02 (Ventricular fibrillation)                          |
| ICD-10-CM I46.9 (Cardiac arrest, cause unspecified)                  |

**Codes related to Traumatic Brain Injury Excluded from Ischemic Stroke Definition**

|         |                                                                                              |
|---------|----------------------------------------------------------------------------------------------|
| S0190XA | Unspecified open wound of unspecified part of head, initial encounter                        |
| S020XXA | Fracture of vault of skull, initial encounter for closed fracture                            |
| S020XXB | Fracture of vault of skull, initial encounter for open fracture                              |
| S02101A | Fracture of base of skull, right side, initial encounter for closed fracture                 |
| S02101B | Fracture of base of skull, right side, initial encounter for open fracture                   |
| S02102A | Fracture of base of skull, left side, initial encounter for closed fracture                  |
| S02102B | Fracture of base of skull, left side, initial encounter for open fracture                    |
| S02109A | Fracture of base of skull, unspecified side, initial encounter for closed fracture           |
| S02109B | Fracture of base of skull, unspecified side, initial encounter for open fracture             |
| S02110A | Type I occipital condyle fracture, unspecified side, initial encounter for closed fracture   |
| S02110B | Type I occipital condyle fracture, unspecified side, initial encounter for open fracture     |
| S02111A | Type II occipital condyle fracture, unspecified side, initial encounter for closed fracture  |
| S02111B | Type II occipital condyle fracture, unspecified side, initial encounter for open fracture    |
| S02112A | Type III occipital condyle fracture, unspecified side, initial encounter for closed fracture |
| S02112B | Type III occipital condyle fracture, unspecified side, initial encounter for open fracture   |
| S02113A | Unspecified occipital condyle fracture, initial encounter for closed fracture                |
| S02113B | Unspecified occipital condyle fracture, initial encounter for open fracture                  |
| S02118A | Other fracture of occiput, unspecified side, initial encounter for closed fracture           |
| S02118B | Other fracture of occiput, unspecified side, initial encounter for open fracture             |
| S02119A | Unspecified fracture of occiput, initial encounter for closed fracture                       |
| S02119B | Unspecified fracture of occiput, initial encounter for open fracture                         |
| S0211AA | Type I occipital condyle fracture, right side, initial encounter for closed fracture         |
| S0211AB | Type I occipital condyle fracture, right side, initial encounter for open fracture           |
| S0211BA | Type I occipital condyle fracture, left side, initial encounter for closed fracture          |
| S0211BB | Type I occipital condyle fracture, left side, initial encounter for open fracture            |
| S0211CA | Type II occipital condyle fracture, right side, initial encounter for closed fracture        |
| S0211CB | Type II occipital condyle fracture, right side, initial encounter for open fracture          |
| S0211DA | Type II occipital condyle fracture, left side, initial encounter for closed fracture         |
| S0211DB | Type II occipital condyle fracture, left side, initial encounter for open fracture           |
| S0211EA | Type III occipital condyle fracture, right side, initial encounter for closed fracture       |
| S0211EB | Type III occipital condyle fracture, right side, initial encounter for open fracture         |
| S0211FA | Type III occipital condyle fracture, left side, initial encounter for closed fracture        |
| S0211FB | Type III occipital condyle fracture, left side, initial encounter for open fracture          |

|         |                                                                                    |
|---------|------------------------------------------------------------------------------------|
| S0211GA | Other fracture of occiput, right side, initial encounter for closed fracture       |
| S0211GB | Other fracture of occiput, right side, initial encounter for open fracture         |
| S0211HA | Other fracture of occiput, left side, initial encounter for closed fracture        |
| S0211HB | Other fracture of occiput, left side, initial encounter for open fracture          |
| S0219XA | Other fracture of base of skull, initial encounter for closed fracture             |
| S0219XB | Other fracture of base of skull, initial encounter for open fracture               |
| S022XXA | Fracture of nasal bones, initial encounter for closed fracture                     |
| S022XXB | Fracture of nasal bones, initial encounter for open fracture                       |
| S0230XA | Fracture of orbital floor, unspecified side, initial encounter for closed fracture |
| S0230XB | Fracture of orbital floor, unspecified side, initial encounter for open fracture   |
| S0231XA | Fracture of orbital floor, right side, initial encounter for closed fracture       |
| S0231XB | Fracture of orbital floor, right side, initial encounter for open fracture         |
| S0232XA | Fracture of orbital floor, left side, initial encounter for closed fracture        |
| S0232XB | Fracture of orbital floor, left side, initial encounter for open fracture          |
| S02400A | Malar fracture, unspecified side, initial encounter for closed fracture            |
| S02400B | Malar fracture, unspecified side, initial encounter for open fracture              |
| S02401A | Maxillary fracture, unspecified side, initial encounter for closed fracture        |
| S02401B | Maxillary fracture, unspecified side, initial encounter for open fracture          |
| S02402A | Zygomatic fracture, unspecified side, initial encounter for closed fracture        |
| S02402B | Zygomatic fracture, unspecified side, initial encounter for open fracture          |
| S0240AA | Malar fracture, right side, initial encounter for closed fracture                  |
| S0240AB | Malar fracture, right side, initial encounter for open fracture                    |
| S0240BA | Malar fracture, left side, initial encounter for closed fracture                   |
| S0240BB | Malar fracture, left side, initial encounter for open fracture                     |
| S0240CA | Maxillary fracture, right side, initial encounter for closed fracture              |
| S0240CB | Maxillary fracture, right side, initial encounter for open fracture                |
| S0240DA | Maxillary fracture, left side, initial encounter for closed fracture               |
| S0240DB | Maxillary fracture, left side, initial encounter for open fracture                 |
| S0240EA | Zygomatic fracture, right side, initial encounter for closed fracture              |
| S0240EB | Zygomatic fracture, right side, initial encounter for open fracture                |
| S0240FA | Zygomatic fracture, left side, initial encounter for closed fracture               |
| S0240FB | Zygomatic fracture, left side, initial encounter for open fracture                 |
| S02411A | LeFort I fracture, initial encounter for closed fracture                           |
| S02411B | LeFort I fracture, initial encounter for open fracture                             |
| S02412A | LeFort II fracture, initial encounter for closed fracture                          |
| S02412B | LeFort II fracture, initial encounter for open fracture                            |

|         |                                                                                                           |
|---------|-----------------------------------------------------------------------------------------------------------|
| S02413A | LeFort III fracture, initial encounter for closed fracture                                                |
| S02413B | LeFort III fracture, initial encounter for open fracture                                                  |
| S0242XA | Fracture of alveolus of maxilla, initial encounter for closed fracture                                    |
| S0242XB | Fracture of alveolus of maxilla, initial encounter for open fracture                                      |
| S02600A | Fracture of unspecified part of body of mandible, unspecified side, initial encounter for closed fracture |
| S02600B | Fracture of unspecified part of body of mandible, unspecified side, initial encounter for open fracture   |
| S02601A | Fracture of unspecified part of body of right mandible, initial encounter for closed fracture             |
| S02601B | Fracture of unspecified part of body of right mandible, initial encounter for open fracture               |
| S02602A | Fracture of unspecified part of body of left mandible, initial encounter for closed fracture              |
| S02602B | Fracture of unspecified part of body of left mandible, initial encounter for open fracture                |
| S02609A | Fracture of mandible, unspecified, initial encounter for closed fracture                                  |
| S02609B | Fracture of mandible, unspecified, initial encounter for open fracture                                    |
| S02610A | Fracture of condylar process of mandible, unspecified side, initial encounter for closed fracture         |
| S02610B | Fracture of condylar process of mandible, unspecified side, initial encounter for open fracture           |
| S02611A | Fracture of condylar process of right mandible, initial encounter for closed fracture                     |
| S02611B | Fracture of condylar process of right mandible, initial encounter for open fracture                       |
| S02612A | Fracture of condylar process of left mandible, initial encounter for closed fracture                      |
| S02612B | Fracture of condylar process of left mandible, initial encounter for open fracture                        |
| S02620A | Fracture of subcondylar process of mandible, unspecified side, initial encounter for closed fracture      |
| S02620B | Fracture of subcondylar process of mandible, unspecified side, initial encounter for open fracture        |
| S02621A | Fracture of subcondylar process of right mandible, initial encounter for closed fracture                  |
| S02621B | Fracture of subcondylar process of right mandible, initial encounter for open fracture                    |
| S02622A | Fracture of subcondylar process of left mandible, initial encounter for closed fracture                   |
| S02622B | Fracture of subcondylar process of left mandible, initial encounter for open fracture                     |
| S02630A | Fracture of coronoid process of mandible, unspecified side, initial encounter for closed fracture         |
| S02630B | Fracture of coronoid process of mandible, unspecified side, initial encounter for open fracture           |
| S02631A | Fracture of coronoid process of right mandible, initial encounter for closed fracture                     |
| S02631B | Fracture of coronoid process of right mandible, initial encounter for open fracture                       |
| S02632A | Fracture of coronoid process of left mandible, initial encounter for closed fracture                      |
| S02632B | Fracture of coronoid process of left mandible, initial encounter for open fracture                        |
| S02640A | Fracture of ramus of mandible, unspecified side, initial encounter for closed fracture                    |

|         |                                                                                                             |
|---------|-------------------------------------------------------------------------------------------------------------|
| S02640B | Fracture of ramus of mandible, unspecified side, initial encounter for open fracture                        |
| S02641A | Fracture of ramus of right mandible, initial encounter for closed fracture                                  |
| S02641B | Fracture of ramus of right mandible, initial encounter for open fracture                                    |
| S02642A | Fracture of ramus of left mandible, initial encounter for closed fracture                                   |
| S02642B | Fracture of ramus of left mandible, initial encounter for open fracture                                     |
| S02650A | Fracture of angle of mandible, unspecified side, initial encounter for closed fracture                      |
| S02650B | Fracture of angle of mandible, unspecified side, initial encounter for open fracture                        |
| S02651A | Fracture of angle of right mandible, initial encounter for closed fracture                                  |
| S02651B | Fracture of angle of right mandible, initial encounter for open fracture                                    |
| S02652A | Fracture of angle of left mandible, initial encounter for closed fracture                                   |
| S02652B | Fracture of angle of left mandible, initial encounter for open fracture                                     |
| S0266XA | Fracture of symphysis of mandible, initial encounter for closed fracture                                    |
| S0266XB | Fracture of symphysis of mandible, initial encounter for open fracture                                      |
| S02670A | Fracture of alveolus of mandible, unspecified side, initial encounter for closed fracture                   |
| S02670B | Fracture of alveolus of mandible, unspecified side, initial encounter for open fracture                     |
| S02671A | Fracture of alveolus of right mandible, initial encounter for closed fracture                               |
| S02671B | Fracture of alveolus of right mandible, initial encounter for open fracture                                 |
| S02672A | Fracture of alveolus of left mandible, initial encounter for closed fracture                                |
| S02672B | Fracture of alveolus of left mandible, initial encounter for open fracture                                  |
| S0269XA | Fracture of mandible of other specified site, initial encounter for closed fracture                         |
| S0269XB | Fracture of mandible of other specified site, initial encounter for open fracture                           |
| S0280XA | Fracture of other specified skull and facial bones, unspecified side, initial encounter for closed fracture |
| S0280XB | Fracture of other specified skull and facial bones, unspecified side, initial encounter for open fracture   |
| S0281XA | Fracture of other specified skull and facial bones, right side, initial encounter for closed fracture       |
| S0281XB | Fracture of other specified skull and facial bones, right side, initial encounter for open fracture         |
| S0282XA | Fracture of other specified skull and facial bones, left side, initial encounter for closed fracture        |
| S0282XB | Fracture of other specified skull and facial bones, left side, initial encounter for open fracture          |
| S0291XA | Unspecified fracture of skull, initial encounter for closed fracture                                        |
| S0291XB | Unspecified fracture of skull, initial encounter for open fracture                                          |
| S0292XA | Unspecified fracture of facial bones, initial encounter for closed fracture                                 |
| S0292XB | Unspecified fracture of facial bones, initial encounter for open fracture                                   |
| S060X0A | Concussion without loss of consciousness, initial encounter                                                 |
| S060X1A | Concussion with loss of consciousness of 30 minutes or less, initial encounter                              |

|         |                                                                                                                                                                          |
|---------|--------------------------------------------------------------------------------------------------------------------------------------------------------------------------|
| S060X9A | Concussion with loss of consciousness of unspecified duration, initial encounter                                                                                         |
| S061X0A | Traumatic cerebral edema without loss of consciousness, initial encounter                                                                                                |
| S061X1A | Traumatic cerebral edema with loss of consciousness of 30 minutes or less, initial encounter                                                                             |
| S061X2A | Traumatic cerebral edema with loss of consciousness of 31 minutes to 59 minutes, initial encounter                                                                       |
| S061X3A | Traumatic cerebral edema with loss of consciousness of 1 hour to 5 hours 59 minutes, initial encounter                                                                   |
| S061X4A | Traumatic cerebral edema with loss of consciousness of 6 hours to 24 hours, initial encounter                                                                            |
| S061X5A | Traumatic cerebral edema with loss of consciousness greater than 24 hours with return to pre-existing conscious level, initial encounter                                 |
| S061X6A | Traumatic cerebral edema with loss of consciousness greater than 24 hours without return to pre-existing conscious level with patient surviving, initial encounter       |
| S061X7  | Traumatic cerebral edema with loss of consciousness of any duration with death due to brain injury prior to regaining consciousness                                      |
| S061X7A | Traumatic cerebral edema with loss of consciousness of any duration with death due to brain injury prior to regaining consciousness, initial encounter                   |
| S061X8  | Traumatic cerebral edema with loss of consciousness of any duration with death due to other cause prior to regaining consciousness                                       |
| S061X8A | Traumatic cerebral edema with loss of consciousness of any duration with death due to other cause prior to regaining consciousness, initial encounter                    |
| S061X9A | Traumatic cerebral edema with loss of consciousness of unspecified duration, initial encounter                                                                           |
| S062X0A | Diffuse traumatic brain injury without loss of consciousness, initial encounter                                                                                          |
| S062X1A | Diffuse traumatic brain injury with loss of consciousness of 30 minutes or less, initial encounter                                                                       |
| S062X2A | Diffuse traumatic brain injury with loss of consciousness of 31 minutes to 59 minutes, initial encounter                                                                 |
| S062X3A | Diffuse traumatic brain injury with loss of consciousness of 1 hour to 5 hours 59 minutes, initial encounter                                                             |
| S062X4A | Diffuse traumatic brain injury with loss of consciousness of 6 hours to 24 hours, initial encounter                                                                      |
| S062X5A | Diffuse traumatic brain injury with loss of consciousness greater than 24 hours with return to pre-existing conscious levels, initial encounter                          |
| S062X6A | Diffuse traumatic brain injury with loss of consciousness greater than 24 hours without return to pre-existing conscious level with patient surviving, initial encounter |
| S062X7  | Diffuse traumatic brain injury with loss of consciousness of any duration with death due to brain injury prior to regaining consciousness                                |
| S062X7A | Diffuse traumatic brain injury with loss of consciousness of any duration with death due to brain injury prior to regaining consciousness, initial encounter             |
| S062X8  | Diffuse traumatic brain injury with loss of consciousness of any duration with death due to other cause prior to regaining consciousness                                 |
| S062X8A | Diffuse traumatic brain injury with loss of consciousness of any duration with death due to other cause prior to regaining consciousness, initial encounter              |
| S062X9A | Diffuse traumatic brain injury with loss of consciousness of unspecified duration, initial                                                                               |

|         |                                                                                                                                                                                      |
|---------|--------------------------------------------------------------------------------------------------------------------------------------------------------------------------------------|
|         | encounter                                                                                                                                                                            |
| S06300A | Unspecified focal traumatic brain injury without loss of consciousness, initial encounter                                                                                            |
| S06301A | Unspecified focal traumatic brain injury with loss of consciousness of 30 minutes or less, initial encounter                                                                         |
| S06302A | Unspecified focal traumatic brain injury with loss of consciousness of 31 minutes to 59 minutes, initial encounter                                                                   |
| S06303A | Unspecified focal traumatic brain injury with loss of consciousness of 1 hour to 5 hours 59 minutes, initial encounter                                                               |
| S06304A | Unspecified focal traumatic brain injury with loss of consciousness of 6 hours to 24 hours, initial encounter                                                                        |
| S06305A | Unspecified focal traumatic brain injury with loss of consciousness greater than 24 hours with return to pre-existing conscious level, initial encounter                             |
| S06306A | Unspecified focal traumatic brain injury with loss of consciousness greater than 24 hours without return to pre-existing conscious level with patient surviving, initial encounter   |
| S06307  | Unspecified focal traumatic brain injury with loss of consciousness of any duration with death due to brain injury prior to regaining consciousness                                  |
| S06307A | Unspecified focal traumatic brain injury with loss of consciousness of any duration with death due to brain injury prior to regaining consciousness, initial encounter               |
| S06308  | Unspecified focal traumatic brain injury with loss of consciousness of any duration with death due to other cause prior to regaining consciousness                                   |
| S06308A | Unspecified focal traumatic brain injury with loss of consciousness of any duration with death due to other cause prior to regaining consciousness, initial encounter                |
| S06309A | Unspecified focal traumatic brain injury with loss of consciousness of unspecified duration, initial encounter                                                                       |
| S06310A | Contusion and laceration of right cerebrum without loss of consciousness                                                                                                             |
| S06311A | Contusion and laceration of right cerebrum with loss of consciousness of 30 minutes or less, initial encounter                                                                       |
| S06312A | Contusion and laceration of right cerebrum with loss of consciousness of 31 minutes to 59 minutes, initial encounter                                                                 |
| S06313A | Contusion and laceration of right cerebrum with loss of consciousness of 1 hour to 5 hours 59 minutes, initial encounter                                                             |
| S06314A | Contusion and laceration of right cerebrum with loss of consciousness of 6 hours to 24 hours, initial encounter                                                                      |
| S06315A | Contusion and laceration of right cerebrum with loss of consciousness greater than 24 hours with return to pre-existing conscious level, initial encounter                           |
| S06316A | Contusion and laceration of right cerebrum with loss of consciousness greater than 24 hours without return to pre-existing conscious level with patient surviving, initial encounter |
| S06317  | Contusion and laceration of right cerebrum with loss of consciousness of any duration with death due to brain injury prior to regaining consciousness                                |
| S06317A | Contusion and laceration of right cerebrum with loss of consciousness of any duration with death due to brain injury prior to regaining consciousness, initial encounter             |
| S06318  | Contusion and laceration of right cerebrum with loss of consciousness of any duration with death due to other cause prior to regaining consciousness                                 |
| S06318A | Contusion and laceration of right cerebrum with loss of consciousness of any duration with death due to other cause prior to regaining consciousness, initial encounter              |



|         |                                                                                                                                                                                              |
|---------|----------------------------------------------------------------------------------------------------------------------------------------------------------------------------------------------|
| S06319A | Contusion and laceration of right cerebrum with loss of consciousness of unspecified duration, initial encounter                                                                             |
| S06320A | Contusion and laceration of left cerebrum without loss of consciousness, initial encounter                                                                                                   |
| S06321A | Contusion and laceration of left cerebrum with loss of consciousness of 30 minutes or less, initial encounter                                                                                |
| S06322A | Contusion and laceration of left cerebrum with loss of consciousness of 31 minutes to 59 minutes, initial encounter                                                                          |
| S06323A | Contusion and laceration of left cerebrum with loss of consciousness of 1 hour to 5 hours 59 minutes, initial encounter                                                                      |
| S06324A | Contusion and laceration of left cerebrum with loss of consciousness of 6 hours to 24 hours, initial encounter                                                                               |
| S06325A | Contusion and laceration of left cerebrum with loss of consciousness greater than 24 hours with return to pre-existing conscious level, initial encounter                                    |
| S06326A | Contusion and laceration of left cerebrum with loss of consciousness greater than 24 hours without return to pre-existing conscious level with patient surviving, initial encounter          |
| S06327  | Contusion and laceration of left cerebrum with loss of consciousness of any duration with death due to brain injury prior to regaining consciousness                                         |
| S06327A | Contusion and laceration of left cerebrum with loss of consciousness of any duration with death due to brain injury prior to regaining consciousness, initial encounter                      |
| S06328  | Contusion and laceration of left cerebrum with loss of consciousness of any duration with death due to other cause prior to regaining consciousness                                          |
| S06328A | Contusion and laceration of left cerebrum with loss of consciousness of any duration with death due to other cause prior to regaining consciousness, initial encounter                       |
| S06329A | Contusion and laceration of left cerebrum with loss of consciousness of unspecified duration, initial encounter                                                                              |
| S06330A | Contusion and laceration of cerebrum, unspecified, without loss of consciousness, initial encounter                                                                                          |
| S06331A | Contusion and laceration of cerebrum, unspecified, with loss of consciousness of 30 minutes or less, initial encounter                                                                       |
| S06332A | Contusion and laceration of cerebrum, unspecified, with loss of consciousness of 31 minutes to 59 minutes, initial encounter                                                                 |
| S06333A | Contusion and laceration of cerebrum, unspecified, with loss of consciousness of 1 hour to 5 hours 59 minutes, initial encounter                                                             |
| S06334A | Contusion and laceration of cerebrum, unspecified, with loss of consciousness of 6 hours to 24 hours, initial encounter                                                                      |
| S06335A | Contusion and laceration of cerebrum, unspecified, with loss of consciousness greater than 24 hours with return to pre-existing conscious level, initial encounter                           |
| S06336A | Contusion and laceration of cerebrum, unspecified, with loss of consciousness greater than 24 hours without return to pre-existing conscious level with patient surviving, initial encounter |
| S06337  | Contusion and laceration of cerebrum, unspecified, with loss of consciousness of any duration with death due to brain injury prior to regaining consciousness                                |
| S06337A | Contusion and laceration of cerebrum, unspecified, with loss of consciousness of any duration with death due to brain injury prior to regaining consciousness, initial encounter             |
| S06338  | Contusion and laceration of cerebrum, unspecified, with loss of consciousness of any duration with death due to other cause prior to regaining consciousness                                 |



|         |                                                                                                                                                                                  |
|---------|----------------------------------------------------------------------------------------------------------------------------------------------------------------------------------|
| S06338A | Contusion and laceration of cerebrum, unspecified, with loss of consciousness of any duration with death due to other cause prior to regaining consciousness, initial encounter  |
| S06339A | Contusion and laceration of cerebrum, unspecified, with loss of consciousness of unspecified duration, initial encounter                                                         |
| S06340A | Traumatic hemorrhage of right cerebrum without loss of consciousness, initial encounter                                                                                          |
| S06341A | Traumatic hemorrhage of right cerebrum with loss of consciousness of 30 minutes or less, initial encounter                                                                       |
| S06342A | Traumatic hemorrhage of right cerebrum with loss of consciousness of 31 minutes to 59 minutes, initial encounter                                                                 |
| S06343A | Traumatic hemorrhage of right cerebrum with loss of consciousness of 1 hours to 5 hours 59 minutes, initial encounter                                                            |
| S06344A | Traumatic hemorrhage of right cerebrum with loss of consciousness of 6 hours to 24 hours, initial encounter                                                                      |
| S06345A | Traumatic hemorrhage of right cerebrum with loss of consciousness greater than 24 hours with return to pre-existing conscious level, initial encounter                           |
| S06346A | Traumatic hemorrhage of right cerebrum with loss of consciousness greater than 24 hours without return to pre-existing conscious level with patient surviving, initial encounter |
| S06347  | Traumatic hemorrhage of right cerebrum with loss of consciousness of any duration with death due to brain injury prior to regaining consciousness                                |
| S06347A | Traumatic hemorrhage of right cerebrum with loss of consciousness of any duration with death due to brain injury prior to regaining consciousness, initial encounter             |
| S06348  | Traumatic hemorrhage of right cerebrum with loss of consciousness of any duration with death due to other cause prior to regaining consciousness                                 |
| S06348A | Traumatic hemorrhage of right cerebrum with loss of consciousness of any duration with death due to other cause prior to regaining consciousness, initial encounter              |
| S06349A | Traumatic hemorrhage of right cerebrum with loss of consciousness of unspecified duration, initial encounter                                                                     |
| S06350A | Traumatic hemorrhage of left cerebrum without loss of consciousness, initial encounter                                                                                           |
| S06351A | Traumatic hemorrhage of left cerebrum with loss of consciousness of 30 minutes or less, initial encounter                                                                        |
| S06352A | Traumatic hemorrhage of left cerebrum with loss of consciousness of 31 minutes to 59 minutes, initial encounter                                                                  |
| S06353A | Traumatic hemorrhage of left cerebrum with loss of consciousness of 1 hours to 5 hours 59 minutes, initial encounter                                                             |
| S06354A | Traumatic hemorrhage of left cerebrum with loss of consciousness of 6 hours to 24 hours, initial encounter                                                                       |
| S06355A | Traumatic hemorrhage of left cerebrum with loss of consciousness greater than 24 hours with return to pre-existing conscious level, initial encounter                            |
| S06356A | Traumatic hemorrhage of left cerebrum with loss of consciousness greater than 24 hours without return to pre-existing conscious level with patient surviving, initial encounter  |
| S06357  | Traumatic hemorrhage of left cerebrum with loss of consciousness of any duration with death due to brain injury prior to regaining consciousness                                 |
| S06357A | Traumatic hemorrhage of left cerebrum with loss of consciousness of any duration with death due to brain injury prior to regaining consciousness, initial encounter              |
| S06358  | Traumatic hemorrhage of left cerebrum with loss of consciousness of any duration with                                                                                            |

|         |                                                                                                                                                                                               |
|---------|-----------------------------------------------------------------------------------------------------------------------------------------------------------------------------------------------|
|         | death due to other cause prior to regaining consciousness                                                                                                                                     |
| S06358A | Traumatic hemorrhage of left cerebrum with loss of consciousness of any duration with death due to other cause prior to regaining consciousness, initial encounter                            |
| S06359A | Traumatic hemorrhage of left cerebrum with loss of consciousness of unspecified duration, initial encounter                                                                                   |
| S06360A | Traumatic hemorrhage of cerebrum, unspecified, without loss of consciousness, initial encounter                                                                                               |
| S06361A | Traumatic hemorrhage of cerebrum, unspecified, with loss of consciousness of 30 minutes or less, initial encounter                                                                            |
| S06362A | Traumatic hemorrhage of cerebrum, unspecified, with loss of consciousness of 31 minutes to 59 minutes, initial encounter                                                                      |
| S06363A | Traumatic hemorrhage of cerebrum, unspecified, with loss of consciousness of 1 hours to 5 hours 59 minutes, initial encounter                                                                 |
| S06364A | Traumatic hemorrhage of cerebrum, unspecified, with loss of consciousness of 6 hours to 24 hours, initial encounter                                                                           |
| S06365A | Traumatic hemorrhage of cerebrum, unspecified, with loss of consciousness greater than 24 hours with return to pre-existing conscious level, initial encounter                                |
| S06366A | Traumatic hemorrhage of cerebrum, unspecified, with loss of consciousness greater than 24 hours without return to pre-existing conscious level with patient surviving, initial encounter      |
| S06367  | Traumatic hemorrhage of cerebrum, unspecified, with loss of consciousness of any duration with death due to brain injury prior to regaining consciousness                                     |
| S06367A | Traumatic hemorrhage of cerebrum, unspecified, with loss of consciousness of any duration with death due to brain injury prior to regaining consciousness, initial encounter                  |
| S06368  | Traumatic hemorrhage of cerebrum, unspecified, with loss of consciousness of any duration with death due to other cause prior to regaining consciousness                                      |
| S06368A | Traumatic hemorrhage of cerebrum, unspecified, with loss of consciousness of any duration with death due to other cause prior to regaining consciousness, initial encounter                   |
| S06369A | Traumatic hemorrhage of cerebrum, unspecified, with loss of consciousness of unspecified duration, initial encounter                                                                          |
| S06370A | Contusion, laceration, and hemorrhage of cerebellum without loss of consciousness, initial encounter                                                                                          |
| S06371A | Contusion, laceration, and hemorrhage of cerebellum with loss of consciousness of 30 minutes or less, initial encounter                                                                       |
| S06372A | Contusion, laceration, and hemorrhage of cerebellum with loss of consciousness of 31 minutes to 59 minutes, initial encounter                                                                 |
| S06373A | Contusion, laceration, and hemorrhage of cerebellum with loss of consciousness of 1 hour to 5 hours 59 minutes, initial encounter                                                             |
| S06374A | Contusion, laceration, and hemorrhage of cerebellum with loss of consciousness of 6 hours to 24 hours, initial encounter                                                                      |
| S06375A | Contusion, laceration, and hemorrhage of cerebellum with loss of consciousness greater than 24 hours with return to pre-existing conscious level, initial encounter                           |
| S06376A | Contusion, laceration, and hemorrhage of cerebellum with loss of consciousness greater than 24 hours without return to pre-existing conscious level with patient surviving, initial encounter |
| S06377  | Contusion, laceration, and hemorrhage of cerebellum with loss of consciousness of any duration with death due to brain injury prior to regaining consciousness                                |

|         |                                                                                                                                                                                              |
|---------|----------------------------------------------------------------------------------------------------------------------------------------------------------------------------------------------|
| S06377A | Contusion, laceration, and hemorrhage of cerebellum with loss of consciousness of any duration with death due to brain injury prior to regaining consciousness, initial encounter            |
| S06378  | Contusion, laceration, and hemorrhage of cerebellum with loss of consciousness of any duration with death due to other cause prior to regaining consciousness                                |
| S06378A | Contusion, laceration, and hemorrhage of cerebellum with loss of consciousness of any duration with death due to other cause prior to regaining consciousness, initial encounter             |
| S06379A | Contusion, laceration, and hemorrhage of cerebellum with loss of consciousness of unspecified duration, initial encounter                                                                    |
| S06380A | Contusion, laceration, and hemorrhage of brainstem without loss of consciousness, initial encounter                                                                                          |
| S06381A | Contusion, laceration, and hemorrhage of brainstem with loss of consciousness of 30 minutes or less, initial encounter                                                                       |
| S06382A | Contusion, laceration, and hemorrhage of brainstem with loss of consciousness of 31 minutes to 59 minutes, initial encounter                                                                 |
| S06383A | Contusion, laceration, and hemorrhage of brainstem with loss of consciousness of 1 hour to 5 hours 59 minutes, initial encounter                                                             |
| S06384A | Contusion, laceration, and hemorrhage of brainstem with loss of consciousness of 6 hours to 24 hours, initial encounter                                                                      |
| S06385A | Contusion, laceration, and hemorrhage of brainstem with loss of consciousness greater than 24 hours with return to pre-existing conscious level, initial encounter                           |
| S06386A | Contusion, laceration, and hemorrhage of brainstem with loss of consciousness greater than 24 hours without return to pre-existing conscious level with patient surviving, initial encounter |
| S06387  | Contusion, laceration, and hemorrhage of brainstem with loss of consciousness of any duration with death due to brain injury prior to regaining consciousness                                |
| S06387A | Contusion, laceration, and hemorrhage of brainstem with loss of consciousness of any duration with death due to brain injury prior to regaining consciousness, initial encounter             |
| S06388  | Contusion, laceration, and hemorrhage of brainstem with loss of consciousness of any duration with death due to other cause prior to regaining consciousness                                 |
| S06388A | Contusion, laceration, and hemorrhage of brainstem with loss of consciousness of any duration with death due to other cause prior to regaining consciousness, initial encounter              |
| S06389A | Contusion, laceration, and hemorrhage of brainstem with loss of consciousness of unspecified duration, initial encounter                                                                     |
| S064X0A | Epidural hemorrhage without loss of consciousness, initial encounter                                                                                                                         |
| S064X1A | Epidural hemorrhage with loss of consciousness of 30 minutes or less, initial encounter                                                                                                      |
| S064X2A | Epidural hemorrhage with loss of consciousness of 31 minutes to 59 minutes, initial encounter                                                                                                |
| S064X3A | Epidural hemorrhage with loss of consciousness of 1 hour to 5 hours 59 minutes, initial encounter                                                                                            |
| S064X4A | Epidural hemorrhage with loss of consciousness of 6 hours to 24 hours, initial encounter                                                                                                     |
| S064X5A | Epidural hemorrhage with loss of consciousness greater than 24 hours with return to pre-existing conscious level, initial encounter                                                          |
| S064X6A | Epidural hemorrhage with loss of consciousness greater than 24 hours without return to pre-existing conscious level with patient surviving, initial encounter                                |
| S064X7  | Epidural hemorrhage with loss of consciousness of any duration with death due to brain injury prior to regaining consciousness                                                               |

|         |                                                                                                                                                                             |
|---------|-----------------------------------------------------------------------------------------------------------------------------------------------------------------------------|
| S064X7A | Epidural hemorrhage with loss of consciousness of any duration with death due to brain injury prior to regaining consciousness, initial encounter                           |
| S064X8  | Epidural hemorrhage with loss of consciousness of any duration with death due to other causes prior to regaining consciousness                                              |
| S064X8A | Epidural hemorrhage with loss of consciousness of any duration with death due to other causes prior to regaining consciousness, initial encounter                           |
| S064X9A | Epidural hemorrhage with loss of consciousness of unspecified duration, initial encounter                                                                                   |
| S065X0A | Traumatic subdural hemorrhage without loss of consciousness, initial encounter                                                                                              |
| S065X1A | Traumatic subdural hemorrhage with loss of consciousness of 30 minutes or less, initial encounter                                                                           |
| S065X2A | Traumatic subdural hemorrhage with loss of consciousness of 31 minutes to 59 minutes, initial encounter                                                                     |
| S065X3A | Traumatic subdural hemorrhage with loss of consciousness of 1 hour to 5 hours 59 minutes, initial encounter                                                                 |
| S065X4A | Traumatic subdural hemorrhage with loss of consciousness of 6 hours to 24 hours, initial encounter                                                                          |
| S065X5A | Traumatic subdural hemorrhage with loss of consciousness greater than 24 hours with return to pre-existing conscious level, initial encounter                               |
| S065X6A | Traumatic subdural hemorrhage with loss of consciousness greater than 24 hours without return to pre-existing conscious level with patient surviving, initial encounter     |
| S065X7  | Traumatic subdural hemorrhage with loss of consciousness of any duration with death due to brain injury before regaining consciousness                                      |
| S065X7A | Traumatic subdural hemorrhage with loss of consciousness of any duration with death due to brain injury before regaining consciousness, initial encounter                   |
| S065X8  | Traumatic subdural hemorrhage with loss of consciousness of any duration with death due to other cause before regaining consciousness                                       |
| S065X8A | Traumatic subdural hemorrhage with loss of consciousness of any duration with death due to other cause before regaining consciousness, initial encounter                    |
| S065X9A | Traumatic subdural hemorrhage with loss of consciousness of unspecified duration, initial encounter                                                                         |
| S066X0A | Traumatic subarachnoid hemorrhage without loss of consciousness, initial encounter                                                                                          |
| S066X1A | Traumatic subarachnoid hemorrhage with loss of consciousness of 30 minutes or less, initial encounter                                                                       |
| S066X2A | Traumatic subarachnoid hemorrhage with loss of consciousness of 31 minutes to 59 minutes, initial encounter                                                                 |
| S066X3A | Traumatic subarachnoid hemorrhage with loss of consciousness of 1 hour to 5 hours 59 minutes, initial encounter                                                             |
| S066X4A | Traumatic subarachnoid hemorrhage with loss of consciousness of 6 hours to 24 hours, initial encounter                                                                      |
| S066X5A | Traumatic subarachnoid hemorrhage with loss of consciousness greater than 24 hours with return to pre-existing conscious level, initial encounter                           |
| S066X6A | Traumatic subarachnoid hemorrhage with loss of consciousness greater than 24 hours without return to pre-existing conscious level with patient surviving, initial encounter |
| S066X7  | Traumatic subarachnoid hemorrhage with loss of consciousness of any duration with death due to brain injury prior to regaining consciousness                                |
| S066X7A | Traumatic subarachnoid hemorrhage with loss of consciousness of any duration with                                                                                           |

|         |                                                                                                                                                                                                                                   |
|---------|-----------------------------------------------------------------------------------------------------------------------------------------------------------------------------------------------------------------------------------|
|         | death due to brain injury prior to regaining consciousness, initial encounter                                                                                                                                                     |
| S066X8  | Traumatic subarachnoid hemorrhage with loss of consciousness of any duration with death due to other cause prior to regaining consciousness                                                                                       |
| S066X8A | Traumatic subarachnoid hemorrhage with loss of consciousness of any duration with death due to other cause prior to regaining consciousness, initial encounter                                                                    |
| S066X9A | Traumatic subarachnoid hemorrhage with loss of consciousness of unspecified duration, initial encounter                                                                                                                           |
| S06810A | Injury of right internal carotid artery, intracranial portion, not elsewhere classified without loss of consciousness, initial encounter                                                                                          |
| S06811A | Injury of right internal carotid artery, intracranial portion, not elsewhere classified with loss of consciousness of 30 minutes or less, initial encounter                                                                       |
| S06812A | Injury of right internal carotid artery, intracranial portion, not elsewhere classified with loss of consciousness of 31 minutes to 59 minutes, initial encounter                                                                 |
| S06813A | Injury of right internal carotid artery, intracranial portion, not elsewhere classified with loss of consciousness of 1 hour to 5 hours 59 minutes, initial encounter                                                             |
| S06814A | Injury of right internal carotid artery, intracranial portion, not elsewhere classified with loss of consciousness of 6 hours to 24 hours, initial encounter                                                                      |
| S06815A | Injury of right internal carotid artery, intracranial portion, not elsewhere classified with loss of consciousness greater than 24 hours with return to pre-existing conscious level, initial encounter                           |
| S06816A | Injury of right internal carotid artery, intracranial portion, not elsewhere classified with loss of consciousness greater than 24 hours without return to pre-existing conscious level with patient surviving, initial encounter |
| S06817  | Injury of right internal carotid artery, intracranial portion, not elsewhere classified with loss of consciousness of any duration with death due to brain injury prior to regaining consciousness                                |
| S06817A | Injury of right internal carotid artery, intracranial portion, not elsewhere classified with loss of consciousness of any duration with death due to brain injury prior to regaining consciousness, initial encounter             |
| S06818  | Injury of right internal carotid artery, intracranial portion, not elsewhere classified with loss of consciousness of any duration with death due to other cause prior to regaining consciousness                                 |
| S06818A | Injury of right internal carotid artery, intracranial portion, not elsewhere classified with loss of consciousness of any duration with death due to other cause prior to regaining consciousness, initial encounter              |
| S06819A | Injury of right internal carotid artery, intracranial portion, not elsewhere classified with loss of consciousness of unspecified duration, initial encounter                                                                     |
| S06820A | Injury of left internal carotid artery, intracranial portion, not elsewhere classified without loss of consciousness, initial encounter                                                                                           |
| S06821A | Injury of left internal carotid artery, intracranial portion, not elsewhere classified with loss of consciousness of 30 minutes or less, initial encounter                                                                        |
| S06822A | Injury of left internal carotid artery, intracranial portion, not elsewhere classified with loss of consciousness of 31 minutes to 59 minutes, initial encounter                                                                  |
| S06823A | Injury of left internal carotid artery, intracranial portion, not elsewhere classified with loss of consciousness of 1 hour to 5 hours 59 minutes, initial encounter                                                              |
| S06824A | Injury of left internal carotid artery, intracranial portion, not elsewhere classified with loss of consciousness of 6 hours to 24 hours, initial encounter                                                                       |

|         |                                                                                                                                                                                                                                  |
|---------|----------------------------------------------------------------------------------------------------------------------------------------------------------------------------------------------------------------------------------|
| S06825A | Injury of left internal carotid artery, intracranial portion, not elsewhere classified with loss of consciousness greater than 24 hours with return to pre-existing conscious level, initial encounter                           |
| S06826A | Injury of left internal carotid artery, intracranial portion, not elsewhere classified with loss of consciousness greater than 24 hours without return to pre-existing conscious level with patient surviving, initial encounter |
| S06827  | Injury of left internal carotid artery, intracranial portion, not elsewhere classified with loss of consciousness of any duration with death due to brain injury prior to regaining consciousness                                |
| S06827A | Injury of left internal carotid artery, intracranial portion, not elsewhere classified with loss of consciousness of any duration with death due to brain injury prior to regaining consciousness, initial encounter             |
| S06828  | Injury of left internal carotid artery, intracranial portion, not elsewhere classified with loss of consciousness of any duration with death due to other cause prior to regaining consciousness                                 |
| S06828A | Injury of left internal carotid artery, intracranial portion, not elsewhere classified with loss of consciousness of any duration with death due to other cause prior to regaining consciousness, initial encounter              |
| S06829A | Injury of left internal carotid artery, intracranial portion, not elsewhere classified with loss of consciousness of unspecified duration, initial encounter                                                                     |
| S06890A | Other specified intracranial injury without loss of consciousness, initial encounter                                                                                                                                             |
| S06891A | Other specified intracranial injury with loss of consciousness of 30 minutes or less, initial encounter                                                                                                                          |
| S06892A | Other specified intracranial injury with loss of consciousness of 31 minutes to 59 minutes, initial encounter                                                                                                                    |
| S06893A | Other specified intracranial injury with loss of consciousness of 1 hour to 5 hours 59 minutes, initial encounter                                                                                                                |
| S06894A | Other specified intracranial injury with loss of consciousness of 6 hours to 24 hours, initial encounter                                                                                                                         |
| S06895A | Other specified intracranial injury with loss of consciousness greater than 24 hours with return to pre-existing conscious level, initial encounter                                                                              |
| S06896A | Other specified intracranial injury with loss of consciousness greater than 24 hours without return to pre-existing conscious level with patient surviving, initial encounter                                                    |
| S06897  | Other specified intracranial injury with loss of consciousness of any duration with death due to brain injury prior to regaining consciousness                                                                                   |
| S06897A | Other specified intracranial injury with loss of consciousness of any duration with death due to brain injury prior to regaining consciousness, initial encounter                                                                |
| S06898  | Other specified intracranial injury with loss of consciousness of any duration with death due to other cause prior to regaining consciousness                                                                                    |
| S06898A | Other specified intracranial injury with loss of consciousness of any duration with death due to other cause prior to regaining consciousness, initial encounter                                                                 |
| S06899A | Other specified intracranial injury with loss of consciousness of unspecified duration, initial encounter                                                                                                                        |
| S069X0A | Unspecified intracranial injury without loss of consciousness, initial encounter                                                                                                                                                 |
| S069X1A | Unspecified intracranial injury with loss of consciousness of 30 minutes or less, initial encounter                                                                                                                              |

|         |                                                                                                                                                                           |
|---------|---------------------------------------------------------------------------------------------------------------------------------------------------------------------------|
| S069X2A | Unspecified intracranial injury with loss of consciousness of 31 minutes to 59 minutes, initial encounter                                                                 |
| S069X3A | Unspecified intracranial injury with loss of consciousness of 1 hour to 5 hours 59 minutes, initial encounter                                                             |
| S069X4A | Unspecified intracranial injury with loss of consciousness of 6 hours to 24 hours, initial encounter                                                                      |
| S069X5A | Unspecified intracranial injury with loss of consciousness greater than 24 hours with return to pre-existing conscious level, initial encounter                           |
| S069X6A | Unspecified intracranial injury with loss of consciousness greater than 24 hours without return to pre-existing conscious level with patient surviving, initial encounter |
| S069X7  | Unspecified intracranial injury with loss of consciousness of any duration with death due to brain injury prior to regaining consciousness                                |
| S069X7A | Unspecified intracranial injury with loss of consciousness of any duration with death due to brain injury prior to regaining consciousness, initial encounter             |
| S069X8  | Unspecified intracranial injury with loss of consciousness of any duration with death due to other cause prior to regaining consciousness                                 |
| S069X8A | Unspecified intracranial injury with loss of consciousness of any duration with death due to other cause prior to regaining consciousness, initial encounter              |
| S069X9A | Unspecified intracranial injury with loss of consciousness of unspecified duration, initial encounter                                                                     |
